# Supplementary material
Source: publisher figshare collection journal article supplement (https://gsajournals.figshare.com/ndownloader/files/25777070)
Supplement: Supplementary file 1 [file 25777070]

roan_scaffold	roan_scaffold_size	cow_chr	cow_chr_start	cow_chr_end
202	4188072	1	759295	4830092
197	6357550	1	4856699	11339308
237	5424465	1	11351730	16767738
140477	18947	1	16767746	16781224
232	6109085	1	16792642	22856396
580	131620	1	23004728	22865809
376	40138	1	23047524	23006493
426	44029	1	23100921	23047526
86957	13996	1	23126781	23115305
664	140811	1	23143162	23284340
118	8682940	1	23288773	31814566
127	8984520	1	31848035	40784603
86368	25177	1	40797193	40812817
269	1429743	1	42321625	40829240
50	6731794	1	42328708	49012451
85844	14310	1	49014966	49023414
52	14379570	1	49034423	63615405
80950	42844	1	63615407	63657562
57	9942348	1	73666653	63657564
451	626586	1	73671179	74312820
206	7285048	1	74320358	81704899
132	8095266	1	90029709	81709670
4	22918528	1	113089742	90029781
19	16267260	1	113108927	129523980
51	14866331	1	144480768	129523981
589	537902	1	145058015	144524656
244	6358653	1	145068608	151493878
87128	27297	1	151494203	151523472
86836	5729924	1	157350012	151523473
87034	43442	1	157350694	157395339
86528	118097	1	157539386	157398777
245_4	1712484	1	158530739	158393394
261	4162087	2	4187251	310355
86438	741628	2	4187252	4934747
684	1028198	2	5929028	4938427
243	4435292	2	10209485	5930442
96	8063711	2	18125553	10227677
81290	25733	2	18159384	18133415
86753	46165	2	18162558	18210617
81168	29805	2	18246526	18216457
85518	18207	2	18269387	18287499
84293	42960	2	18330456	18287501
325	3719171	2	18331331	22080841
340	4502257	2	26597396	22084089
86849	7585323	2	26628215	34156100
86882	10006079	2	44583501	34156127
73577	13811	2	44598860	44584396
81165	16777	2	44604133	44621342
66	16937233	2	61526585	44624376
86086	17706	2	61549819	61533863
83596	14809	2	61573483	61558304
30	9326519	2	70889274	61580284
321	1825931	2	70889669	72723895
122	4410260	2	77065128	72732570
306	2977716	2	77083276	80026809
208	4705475	2	84744819	80026813
211	6742842	2	91481798	84745725
547	38423	2	91482018	91523757
741	56058	2	91525635	91572802
28	15351239	2	106808758	91573850
497	132483	2	106816419	106954216
86876	213152	2	106961066	107178688
204	12838921	2	120038583	107183464
87062	10504	2	120049495	120049485
88405	11329	2	120060662	120059573
494	2382586	2	122691988	120069704
86133	31940	2	122694942	122726778
86307	55801	2	122786311	122734121
280	3140316	2	125914101	122786312
474	6605667	2	125917146	132522065
86880	26401	2	132581508	132578722
313	3033370	2	132616419	135668480
663	482405	2	135668494	136124061
604	3638680	3	151603	3762871
84952	66191	3	3762872	3831039
86740	3228974	3	7088768	3831042
67965	42618	3	7088769	7124746
86411	812050	3	7124749	7937518
86675	49942	3	8102716	8044155
86508	451159	3	8102507	8561767
86070	318317	3	8934266	8607521
122495	17948	3	8902187	8929256
86413	553221	3	9480926	8934972
86173	255356	3	9737665	9485083
86678	1986519	3	9743250	11779969
86406	439599	3	11795012	12510398
834	2014737	3	12522115	14645772
85365	44555	3	14690422	14645776
327	2193458	3	16960705	14690783
449	68609	3	17017252	16911679
86853	316672	3	17022748	17460220
198	2600676	3	17658004	20138180
86886	32268	3	20141210	20173262
610	714837	3	20901911	20177542
83338	59215	3	21191060	21097318
86776	65468	3	21283614	21233044
87017	20689	3	21306341	21326166
289	1312387	3	21336255	22800376
86843	47061	3	22717169	22716794
134	8464556	3	22800578	31349072
283	1865347	3	31350637	33210113
85593	68988	3	33210115	33279098
85370	93200	3	33279100	33371200
85903	206394	3	33578373	33371274
85579	75427	3	33578374	33657428
86226	399240	3	34042911	33657527
82651	38025	3	34042912	34081074
83329	41281	3	34084242	34124893
79010	27564	3	34152681	34124898
86168	344863	3	34152698	34493259
78218	43658	3	34539497	34495154
86532	1231389	3	34539499	35780154
84247	37490	3	35780164	35816975
86953	6592321	3	42560702	86953
73	11402373	3	54113391	42615683
86694	15200	3	54153386	54118569
338	40056	3	54155647	54212344
86556	202436	3	54721003	54447240
29	25739776	3	80918131	54915981
86251	523506	3	81417275	80918133
825	1957631	3	81417276	83517539
576	7868224	3	83348753	91284635
83579	27224	3	91289600	91317976
403	280059	3	91622682	91328049
213	32323	3	91654509	91637785
413	1218225	3	91699162	92963751
349	411632	3	93381760	92969127
17	12668147	3	106287413	93468354
84720	13756	3	106288717	106329707
419	225672	3	106330056	106319359
268	1330999	3	107920616	106316538
242	5375307	3	113317217	107922067
43	20181	3	113439077	113449919
42	20181	3	113436751	113456436
82882	11862	3	113493197	113483186
39	3066595	3	116505009	113510096
250	4051407	3	116511589	120943168
156	7994523	4	303031	7652167
136329	13514	4	7656298	7666079
207	17251472	4	25375379	7671353
70	6951019	4	32755918	25375384
144	29427	4	32381105	32401134
784	38471	4	33021075	32978853
795	71878	4	32978808	32513679
341	44096	4	32826710	32518359
86988	157725	4	32728220	32574211
151312	10231	4	32769268	33052808
151310	23297	4	33028818	32768296
87002	52980	4	32790649	32824886
90554	16743	4	32848903	32563862
122503	18135	4	32876151	32862592
192	2327193	4	35338061	33053716
330	8059081	4	35340603	43338763
84043	39471	4	43339566	43380519
86693	2644319	4	46079926	43381396
67919	55430	4	46132978	46079927
86494	725285	4	46852531	46132981
85371	66092	4	46852532	46920468
85071	85004	4	46920469	47008844
86736	3059635	4	47009747	50147127
86920	15455372	4	65646249	50166384
731	1787321	4	67425050	65646251
83900	21028	4	67446453	67425051
229	9463606	4	67456284	76896395
84794	38074	4	76896396	76934804
84908	49862	4	76985005	76934807
85472	77349	4	76985500	77065418
85494	51508	4	77117248	77065419
75936	15770	4	77132977	77117251
86811	4528160	4	77132979	81687900
335	10476635	4	92557700	81687901
84640	26679	4	92584721	92557702
86209	199518	4	92808933	92595734
81715	11436	4	92814443	92825550
317	1425630	4	92833381	94278593
157	8378620	4	94348613	102888799
86915	2658446	4	102893909	105628774
507	16319	4	105704063	105629249
86960	195819	4	106113021	105718582
601	281217	4	106113759	106399584
233	10881012	4	106416924	118166135
86477	209311	4	118383439	118166193
86664	1466437	4	118383441	119846129
142604	14683	5	68265	68269
286	2043373	5	2451601	561889
14	23021258	5	25645475	2452410
86665	46620	5	25700167	25653369
87114	153783	5	25871701	25715937
84722	23825	5	25897219	25872520
249	863268	5	26787338	25918313
86944	87546	5	26887169	26796172
74009	11650	5	26894901	26906209
87070	472453	5	26915497	27383514
650	11525	5	27408600	27420274
380	240319	5	27708082	27438407
322	2047886	5	27714814	29826586
692	709423	5	29826960	30537912
493	13528	5	30569202	30544728
563	203020	5	30773495	30574196
85348	22617	5	30799565	30776856
542	1630782	5	32554475	30809440
117	7791504	5	40359936	32554478
10	15075104	5	40364914	55734508
86971	83753	5	55844457	55739927
86373	88318	5	55845017	55935333
606	257666	5	56192954	55935334
86366	10622	5	56197234	56207641
86873	49594	5	56265205	56216338
86561	27913	5	56294294	56266451
490	828868	5	56299017	57060078
86958	38314	5	57098336	57060084
654	256785	5	57357792	57099859
351	788404	5	57362587	58362935
575	365935	5	58375966	58806809
561	289704	5	58693210	59439758
18	14648521	5	74383900	59597652
86900	113918	5	74510034	74594729
781	744912	5	74691319	75450052
476	699689	5	76244827	75450147
273	857657	5	76250416	77201821
133	21331585	5	99007408	77202577
293	2489610	5	99149808	101971375
86284	364736	5	102625828	102626032
85164	43289	5	102704790	102761075
831	6328500	5	102873718	109509939
85128	38632	5	109549873	109509941
86627	770826	5	110328284	109549874
84123	40370	5	110329446	110373046
85659	70207	5	110445705	110378378
86791	2642321	5	113071171	110446677
86756	835794	5	113925929	113094712
695	2547892	5	116575906	113925930
86154	11819	5	116600526	116539018
84280	10305	5	116560467	116574234
454	3504687	5	116600540	120072855
86835	5553958	6	96221	5445334
85466	16685	6	5520108	5544748
347	19138	6	5578664	5562538
571	56849	6	5578667	5636859
424	15177	6	5651867	5637616
23	24563279	6	30737260	5788081
31	10713496	6	41545449	30737262
183	2154459	6	43715831	41550608
49	8138324	6	43719201	51888422
124	6205658	6	58046038	51893437
68	12330304	6	70457675	58076695
801	1753340	6	72195784	70462146
85007	78921	6	72195785	72297701
84609	10303	6	72311452	72303204
2	32919872	6	105720135	72331907
193	7168854	6	113071659	105727703
85351	15075	6	113117822	113063773
297	895470	6	113037324	113991335
311	2223669	6	116239299	113995184
792	35568	6	116277185	116242086
810	20210	6	116322736	116342664
150981	11826	6	116354614	116348339
150982	15256	6	116376784	116362182
326	1327045	6	116390251	117773384
319_1	4714491	7	68928	304595
379	283062	7	532453	358652
556	724611	7	1351484	533139
288	1180233	7	2727016	1532825
84911	44883	7	2743656	2799933
85398	127866	7	2999288	2871674
179	3959721	7	6950577	3003063
555	664778	7	7603710	6960851
231	1747209	7	7613448	10875704
302	1791287	7	10962853	12825702
675	923244	7	13857211	12825836
819	770193	7	14784216	13897354
86952	482135	7	15320439	14821933
662	515358	7	15320440	15843868
84782	20830	7	15848517	15867812
86673	1046070	7	16947514	15867814
84951	41161	7	16985306	16947516
86462	581608	7	17596033	86462
86122	159607	7	17770687	17614567
86855	30570	7	17777854	17808271
86904	73908	7	17810410	17769598
86321	351592	7	18199909	17857421
86710	1481628	7	19748252	18207134
86959	964472	7	20735268	19748253
82433	17926	7	20777617	20795313
86622	1164538	7	21973912	20795320
86541	1033449	7	22998949	21975863
55	14286652	7	22998951	37431226
86418	607170	7	38012093	37431227
666	827814	7	38849950	38012096
81589	21424	7	38871454	38849952
85282	46138	7	38871456	38922150
87032	77444	7	38998269	38922153
85188	24001	7	39003793	39028189
86557	1200216	7	39028191	40197275
86709	2848221	7	43086492	40219040
85660	40409	7	43137545	43094376
85404	39221	7	43173684	43137546
86857	927691	7	44101080	43173745
253	2356203	7	46493922	44101082
125	4362849	7	50869055	46496910
310	1414723	7	50875222	52435391
86297	240285	7	52753037	52514343
655	155657	7	52910803	52753624
128	4646577	7	57524143	52911955
221	2976827	7	60453899	57528155
681	908473	7	61461003	60507985
86448	24250	7	61490960	61466705
296	862169	7	62365804	61493327
84116	23461	7	62374079	62395900
114	5982786	7	62399114	68662348
272	1497798	7	68797683	70298317
87137	141430	7	70494241	70351654
84899	20728	7	70516997	70496222
86974	90224	7	70520955	70610965
87131	351821	7	70966292	70611689
81163	12834	7	70967893	70980312
86983	363206	7	70991052	71351275
84307	35105	7	71390101	71353423
85426	26813	7	71390103	71416139
77	8679701	7	80143651	71422944
84303	37592	7	80181368	80143654
74092	10276	7	80192295	80182063
274	1201652	7	81369453	80194020
85408	34033	7	81375130	81413507
79	25574742	7	107263655	81420858
185	3281247	7	110545549	107263659
722	95860	7	110628357	110559362
608	1066794	8	146262	1187290
278	6303558	8	1190015	7575485
74	15139984	8	22551107	7581383
86830	120062	8	22787978	22832946
67925	22058	8	22683307	23123768
234	3829304	8	27126496	23295044
480	124164	8	27138815	27268083
368	39372	8	27312477	27271042
372	71146	8	27313236	27408368
69	7509305	8	27408370	34937078
350	193297	8	34946598	35154412
150517	39794	8	35156755	35193118
150520	11350	8	35199585	35201782
422	53418	8	35277593	35218792
151	8514216	8	35277594	43838127
86861	9292988	8	53249395	43846120
86812	4518274	8	53272835	57825675
86082	22028	8	57860339	57837982
86473	1261530	8	57901407	59159097
83373	12962	8	57902709	57834465
86816	886054	8	59181768	60071083
85630	98453	8	60277783	60108695
83227	14593	8	60287421	60278101
59192	13135	8	60306977	60293637
259	5046863	8	65481120	60307236
84305	22165	8	65634100	65701780
334	3712590	8	65714948	69426471
87112	27056	8	69428949	69456030
101	6400338	8	75866609	69462582
79537	24168	8	75899129	75875655
119	8398764	8	75902970	84388701
85552	179522	8	84388703	84571773
86980	405366	8	84980632	84571775
291	1933724	8	85002647	86954031
485	840945	8	87769471	86955539
519	896275	8	88722967	87766909
301	2548562	8	91270595	88723898
220	2970591	8	91270599	94122928
195	7831624	8	94334189	102312424
223	3238502	8	102352371	105547251
128333	18447	8	105550464	105568613
226	7348031	8	112977771	105550233
72783	11308	8	113013523	113010239
86889	9373116	9	424875	9319455
86759	3377188	9	9319501	12694712
85989	273093	9	12694713	12887629
1	20531221	9	33151409	12945055
786	1039978	9	34236035	33163198
150	4529627	9	34260997	38705380
85745	60912	9	38762619	38705381
307	2698207	9	41483170	38762633
61	13078883	9	54681896	41483172
59	8420020	9	63072100	54696447
86390	25776	9	63074402	63074401
7	23302423	9	63099720	87001990
257	44618	9	87101116	87004712
37	15246325	9	102494974	87234537
504	1343599	9	102513001	103927160
743	194400	9	104142556	103928650
154	3824710	10	4217468	439843
113	8018237	10	4218077	12309303
840	1148296	10	12309325	13472755
228	3462587	10	13490064	16970582
828	2055837	10	16971710	19194925
86650	1756939	10	19196768	20989459
84898	40978	10	21030002	20989460
85002	20997	10	21051493	21030003
85059	47419	10	21099755	21051495
86790	1818812	10	18382771	25268188
87125	10016	10	25334291	23774870
86518	802105	10	26302611	25104914
86095	287307	10	26326145	26630938
188	9650390	10	36440290	26654555
86336	12821	10	36453085	36440292
312	753686	10	37207428	36461130
84586	11669	10	37208237	37220131
85560	17780	10	37244598	37226615
373	765319	10	37248570	37996840
25	12723616	10	38002789	50904578
27	13782619	10	51422366	65299198
390	10866839	10	65301431	76273151
86385	571617	10	76273153	76861689
86913	10769101	10	76861691	87744031
86670	875903	10	87757835	88646720
148	12734216	10	101523920	88651235
84403	19580	10	101523921	101539892
241	1479921	10	101545087	103086022
86656	106905	10	103251852	103123921
65	10089939	11	83431	10095364
85410	25707	11	10156172	10130415
277	1388369	11	10157979	11531606
9	16034030	11	11536594	28065686
640	1349128	11	29440853	28070235
81590	13486	11	29442754	29455992
74038	14004	11	29463650	29478557
411	401992	11	29898010	29484636
85601	17686	11	29917583	29899322
116	7816186	11	37685595	29921513
112	7049253	11	37694671	44896104
76	14562859	11	59430635	44896107
85493	16735	11	59432374	59444216
38	15717100	11	75236608	59445650
85139	80469	11	75317744	75236610
130	9897671	11	85332474	75317748
54	8178457	11	93664664	85342054
66868	13888	11	93672474	93686345
238	1748809	11	95492654	93686348
430	736984	11	96256058	95497573
264	2578252	11	96258654	98819471
84719	27452	11	98846865	98819489
227	4342745	11	103238874	98849290
117888	18530	11	103260136	103252210
314	1027916	11	103238877	104374534
247	2600341	11	106941434	104374878
262	6051258	12	174760	5927871
83080	14172	12	6046384	5928143
86909	79103	12	5936053	6017816
287	1003319	12	6046386	6990488
438	14507172	12	6994401	22158103
81482	29206	12	22158105	22186117
86858	7802575	12	30085314	22186123
86848	5944821	12	36108574	30085598
201	6872086	12	43087266	36111314
3	24379493	12	43089974	67551555
382	51489	12	67556097	67603105
750	22566	12	67679025	67648620
446	97320	12	67778287	67682722
394	38194	12	67787992	67831222
87028	21976	12	67831230	67858411
270	1923884	12	67858518	70818313
84724	23647	12	69818478	70405605
472	164777	12	70191536	71341931
732	356305	12	72429467	71153847
86187	312406	12	72755115	72618431
191	10614608	12	83471532	72785469
420	2955201	12	86467650	83491783
734	609340	12	87098833	86468882
60	10446590	13	10991814	632660
303	4712213	13	17645334	12947511
85135	41870	13	18158627	18199640
86728	2387008	13	20592976	18199690
442	40141	13	20637933	20593081
443	48343	13	20637936	20683332
85742	103546	13	20791048	20690175
62	7206792	13	27976181	20791050
121	10403699	13	38391106	27993984
83535	15108	13	38504264	38391108
150429	36712	13	38454843	38491823
181	2486933	13	38504570	41022418
88141	17748	13	41030181	41039590
224	2458627	13	43680724	41024022
86703	31984	13	43692404	43693168
284	2102652	13	43726070	45864719
86430	21997	13	45865305	45884554
56	7538972	13	53231912	45885187
86575	504467	13	53747305	53235997
86941	48630	13	53798550	53747889
86440	20045	13	53800580	53820597
81192	16607	13	53855947	53839928
86775	118392	13	53979351	53863173
396	277969	13	54256872	53979666
395	653555	13	54256874	54915528
58	7540116	13	54915551	62482665
222	2430198	13	62487289	64895920
503	1591331	13	64898788	66515688
826	3312505	13	69818168	66515690
824	2200919	13	69818169	72044836
199	5565615	13	77670148	72050224
324	5776678	13	77688842	83431592
86727	990531	14	1553329	512518
86457	388933	14	1553337	2002035
260	11276359	14	13205327	2006944
686	11903	14	13303412	13295544
821	10056	14	13305140	13315365
644	19649	14	13340690	13358301
718	18366	14	13385755	13366610
735	26656	14	13576665	13597585
378	11590	14	13606584	13627793
754	18385	14	13800090	13813530
86943	5611890	14	13790512	19492307
86414	403952	14	19903514	19494084
152	6326363	14	26326975	19914355
205	4286406	14	26326987	30675180
82796	40279	14	30675855	30716376
22	14714043	14	45504065	30716429
34	9304026	14	55059648	45553299
295	5899640	14	61021274	13523844
20	12281847	14	73378995	61021275
123	7838932	14	73393737	81439229
549	774585	14	81454198	82238595
78	9962901	15	10504405	78953290
538	1310783	15	11807133	10507446
32	13847729	15	25825773	11808869
304	1657285	15	25833537	27478144
86178	11840	15	27486769	27499223
267	1752070	15	27513069	29277041
86842	20325	15	29303779	29283675
429	344331	15	29651534	29304417
86441	16851	15	29693595	29676622
8	15075497	15	29693597	45078445
87139	963065	15	45079362	46020990
85489	260120	15	46097871	46274170
80777	103977	15	46425121	46325118
85016	47032	15	46471818	46425122
86193	305793	15	46792504	46479979
67941	34976	15	46828127	46792506
86515	1306507	15	48361591	46828129
331	1555078	15	50902392	48413341
266	1197970	15	52203966	50906220
86801	34289	15	52244234	52209546
332	2737474	15	54975709	52244290
564	125631	15	55091786	54993488
484	572994	15	55125955	55706361
75960	10845	15	55715817	55726719
83725	10151	15	55726721	55737013
77348	17993	15	55755180	55737014
428	722738	15	56513456	55755181
225	4940431	15	56522230	61446416
375	85222	15	61448148	61532891
85556	45884	15	61607641	61532893
71	14223237	15	75931957	61607643
294	1320257	15	77259236	75934352
239	1435929	15	77259238	79532139
300	644970	15	78947628	79929441
809	22012	15	79531571	78944750
285	612672	15	79964124	80580333
86883	10736	15	80630205	80624545
86643	15904	15	80650431	80652360
534	1721343	15	82622164	80655868
751	17891	15	82604825	82622162
536	1311984	15	82622297	83935135
495	100328	15	84370765	84441219
603	54789	15	84623002	84441190
496_1	47593	15	84624744	84646769
693	689297	16	1254093	637177
86851	108645	16	1261714	1363169
384	19361	16	1363171	1384025
412	17172	16	1418723	1403380
74076	26784	16	1444781	1418725
87024	26659	16	1461265	4310117
465	13070	16	1495370	1507810
258	2818749	16	4356339	1507812
471	20787	16	4367537	1384653
292	697683	16	4392538	5101604
89427	26801	16	5113423	5128490
87011	10477	16	5135256	5106326
149656	10905	16	5135361	5143139
149653	14136	16	5147451	5159594
609	460344	16	6055284	5171877
85738	53203	16	6161470	6009452
88551	15275	16	6221496	6111342
611	535271	16	6230874	6771127
150108	38270	16	6813831	6774816
86722	45505	16	7221028	6977936
16	12252707	16	7316048	20067968
67	8998856	16	29120774	20070221
180	4897819	16	29127202	34109286
63	8247326	16	34109287	42324452
85651	49810	16	42372928	42324466
79006	92306	16	42372930	42462315
85003	60193	16	42462316	42521735
683	366763	16	42903544	42521736
785	1458346	16	42903575	44352588
748	72921	16	44473726	44418362
88222	27622	16	44508977	44481507
84495	21151	16	44522899	44510255
149	5685901	16	50375992	44523590
836	808062	16	51180128	50380213
522	266993	16	51448463	51180129
190	3233376	16	51451948	54879502
315	1699870	16	54921730	56621330
115	6795801	16	56622570	63394545
11	17451559	16	63403421	80936314
95	3354525	17	168238	3316480
86581	25422	17	3325206	3354142
391	5511461	17	8961659	3361493
85743	22319	17	8968754	8968664
845	4899288	17	8980117	14019528
21	14784213	17	14060509	28948095
35	15225215	17	28952961	44651993
85469	11999	17	44671764	44664445
739	489466	17	44686495	45167371
84895	27294	17	45174732	45202076
475	1424715	17	46634393	45202210
87117	289573	17	46926775	46640328
84622	28445	17	46929774	46958635
98	8122391	17	46961572	55128977
82652	17717	17	55152484	55134913
85062	38425	17	55190958	55152486
86303	112589	17	55308595	55190959
337	3021674	17	55315245	58338147
182	3090902	17	58339608	61391203
336	789381	17	61395752	62202713
84956	10165	17	62219197	62228640
81	8199009	17	62257556	70728679
86805	43641	17	70971045	70949321
86914	78305	17	70971365	71058425
85329	31688	17	71075220	71076485
282	1210524	17	72342893	71103342
86690	39017	17	72346676	72387837
467	745002	17	72398848	73135621
85760	161084	18	755321	764038
86550	1069378	18	768610	1814509
839	3723516	18	5561760	1814593
84705	35963	18	5597682	5561761
86725	1494701	18	7105840	5598090
73790	31906	18	7105843	7140333
85255	65185	18	7206013	7140363
86526	819198	18	7211142	8044012
333	4629399	18	12644014	8044671
246	1949270	18	14598950	12644016
84382	19824	18	14608145	14628605
212	9023288	18	14633051	23955537
86978	13655	18	23982610	23966958
69730	10117	18	24021297	24031105
560	1071495	18	24031116	25107777
86202	226304	18	25111875	25347914
85902	182908	18	25350185	25534040
78068	24587	18	25534052	25557506
86302	250567	18	25559148	25812718
84916	39900	18	25812720	25867137
138270	11942	18	25865256	25852401
456	410830	18	25867372	26273717
84467	26333	18	26280711	26307087
94	7847733	18	34208934	26313784
290	1172429	18	34211481	35406725
84959	19059	18	35414218	35433429
85663	40649	18	35447221	35489675
209	4868908	18	35490377	40631626
73578	39568	18	40670958	40631634
79459	16385	18	40687286	40670959
86325	312779	18	40691020	41005076
84983	58947	18	41066060	41006185
86529	747931	18	41067413	41818489
81455	23352	18	41847061	41824102
84009	20626	18	41852448	41873136
263	3247860	18	41887942	45267676
84876	33730	18	45370957	45301969
150732	37284	18	45373791	45357252
184	3513438	18	48944851	45409737
740	275936	18	48969400	49282263
574	971470	18	49321034	50279512
309	612659	18	50277640	51338336
86034	59798	18	51345770	51405181
548	312448	18	51756704	51444830
690	1399212	18	53225273	51769098
453	2041413	18	53228304	55287765
85294	29113	18	55288415	55343765
203	1921911	18	55344195	57299384
543	285069	18	57576968	57303573
271	1395864	18	57645610	59082231
87077	499413	18	60400901	58817848
573	411846	18	60332480	60991462
753	529360	18	61740939	61076245
86806	73571	18	61771482	61837506
774	792205	18	61853609	62636312
329	1189167	18	62596938	63901426
661	1572744	18	63901428	65531753
86346	289393	18	65532112	65818377
189	6764412	19	7379968	559121
86996	40367	19	7383176	7424717
74181	11738	19	7427667	7439630
279	2103772	19	7453430	9580301
33	10468805	19	20100146	9614723
730	440925	19	20550598	20108267
590	103006	19	20644528	20550599
87042	185921	19	20843919	20651865
126	3186445	19	20847894	24131147
69738	12284	19	24176376	24164858
841	835474	19	25013931	24176379
235	2141706	19	25013933	27151966
86429	10217	19	27151968	27275061
149302	16871	19	27180438	27172756
83963	15500	19	27294349	27279879
323	2150975	19	29459713	27294459
87080	15653	19	29461329	29492494
146	4700459	19	29515736	34252030
97	6260831	19	34252897	40577300
345	664377	19	40579932	41292486
82975	12251	19	41292784	41358349
445	69350	19	41412634	41358351
275	1368739	19	42873328	41483250
592	281109	19	42922339	43224281
85699	14654	19	43280516	43230404
342	1138275	19	43313444	44485310
194	3644171	19	48205223	44487110
360	1946581	19	50226485	48222113
660	321014	19	50854312	50540412
370	199433	19	51057574	50854678
84368	20893	19	51066971	51088054
582	499264	19	51093886	51597299
86087	21748	19	51601469	51623103
498	399896	19	52032478	51627507
83957	16417	19	52034751	52049639
86036	253378	19	52470964	52069382
85223	55715	19	52528017	52470965
602	2379383	19	54915780	52528019
541	352084	19	54937853	55293253
72	7879616	19	55293254	63365080
230	6541301	20	6791490	225454
148933	27282	20	6824838	6801318
0	24338431	20	31613649	6887631
13	37984254	20	31617453	70814124
86490	383882	20	71239388	70814180
84914	25960	20	71266285	71239551
86571	601883	20	71266498	71856831
597	65648	20	71971385	71911528
150778	33558	21	32960	11920
150867	39699	21	61380	34010
83489	17672	21	229488	253456
86203	382949	21	1047694	32922118
381	713449	21	1099215	1661730
478	702353	21	2435917	1664278
85147	13264	21	2448466	2461548
85661	17651	21	2468328	2483386
77479	13388	21	2510239	2524642
505	1172213	21	2537731	3738974
86354	10162	21	3751486	3775476
86503	34767	21	3782171	3812883
537	882352	21	4722643	3835313
492	1760620	21	4736253	6478539
656	40154	21	6516315	6484718
371	40009	21	6516318	6557259
567	255541	21	6557853	6816934
437	461863	21	7264795	6828238
511	150958	21	7267508	7398118
358	40109	21	7398120	7424684
461	1839947	21	9281899	7434086
78084	16174	21	9288960	9308043
544	1132969	21	9323427	10438679
436	106672	21	10556603	10447064
423	2251311	21	12795480	10556894
86295	27603	21	12797826	12825280
501	1096047	21	13958446	12825986
86498	39549	21	14007286	13961385
85803	20450	21	14030711	14010024
418	4193857	21	14036956	18196392
386	1486972	21	18229919	19786225
554	341927	21	20161577	19783614
69689	16244	21	20168027	20186549
83374	59774	21	20246902	20183784
66872	14149	21	20261291	19672106
427	2347841	21	20261294	22627986
85163	12950	21	22639071	22628397
479	485828	21	23273653	22797429
85092	75133	21	23273724	23337143
410	1572465	21	23458334	25063750
483	9434484	21	25069555	34720779
84774	14689	21	34720782	34726843
87004	10602	21	34777701	34768329
87041	52110	21	34849400	34777703
87021	23345	21	34857833	34832372
468	11052	21	34877734	34892662
316	9954220	21	44952944	34892670
389	12240	21	44978359	44962812
388	7653697	21	44991192	52715513
641	142183	21	52730665	52870220
464	2409011	21	55318639	52875268
487	27460	21	55337706	55373833
143452	39506	21	55378320	55338864
86625	176346	21	55379362	55564601
87119	69431	21	55586490	55652102
86754	30981	21	55675988	55650362
276	142043	21	55823563	55676107
366	139587	21	55981019	55823564
120	11489923	21	67768947	55982658
87157	12870	21	67782128	67769331
281	2035378	21	69809281	67837172
319_2	4714491	22	151432	4581170
75956	33372	22	4617301	4582159
86492	887754	22	4617302	5486431
82	9023739	22	14791730	5488200
696	1985218	22	14791732	16799966
84297	33963	22	16834361	16799971
24	16254981	22	33040567	16837729
86658	93748	22	33052258	33006924
847	77649	22	33052260	33128657
200	9258316	22	33128697	42446978
83	7305035	22	42473305	49913485
85212	56019	22	49969966	49913488
86455	352265	22	49969968	50327701
86052	155591	22	50332976	50487062
85222	39867	22	50487064	50526380
86379	326624	22	50526381	50855504
83984	33482	22	50888369	50855513
619	686540	22	51608669	50888371
86972	31838	22	51643688	51643683
248	4457990	22	56169864	51621609
187	4418687	22	56177205	60681639
85717	147152	23	3652115	3501494
86778	3597999	23	7283968	3652116
797	474361	23	7289414	7770783
85845	106336	23	7875598	7770784
158	8843780	23	7878126	16855868
85261	58336	23	16914948	16855885
86655	724048	23	17682276	16914950
85730	55141	23	17682281	17741076
155	7087411	23	25098495	17744816
305	821139	23	26210942	25117337
673	148422	23	26272018	26023601
85811	165009	23	25970224	26582424
84961	87502	23	26063511	26636274
572	59137	23	26696709	26653564
846	17747	23	26696710	26824629
87129	17468	23	26855292	26891586
400	396825	23	27328264	26886131
86965	414821	23	27810605	27388391
87088	10321	23	27822053	27833507
149340	12425	23	27853194	27857013
149343	23316	23	27928748	27902478
585	754919	23	28866208	27979027
500	439290	23	29463802	28884637
86401	18980	23	29485920	29485927
638	384838	23	29504390	29878054
150886	16654	23	29939847	29931138
469	746940	23	29974806	30775445
562	439979	23	31246727	30791122
85344	13144	23	31246729	31335198
86948	15482	23	31286000	31302826
776	28341	23	31329490	31307805
299	3286352	23	34657986	31336079
102	33676	23	34675277	34672492
86977	114602	23	34936476	34758988
64	15565972	23	50645038	34994650
470	14669	23	50730220	50736742
639	1588600	23	52410258	50780989
85063	23482	23	52431623	52428749
86375	499900	24	600763	174031
86235	275673	24	873979	601195
86495	738946	24	874632	1602679
86699	1876846	24	3482761	1603340
256	3409447	24	6793794	3483174
83572	11303	24	6814437	6800603
6	26082471	24	33045785	6814752
374	14124	24	33045809	33060287
149603	12666	24	33062559	33075434
149599	17969	24	33075613	33091176
149601	11026	24	33096742	33107715
758	11733	24	33122030	33108734
53	9644024	24	33122034	42796733
5	18788595	24	61863155	42803537
817	20984	24	61905755	61865486
86897	207661	24	62128901	61931944
716	31555	25	14652	28305
691	934174	25	992515	63300
186	1468524	25	1001409	2486696
82398	7326	25	2486699	2534083
665	269355	25	2540516	2850507
84753	48704	25	2850866	2900910
84188	29488	25	2931159	2900933
82190	16634	25	2931181	2947763
265	22728627	25	2947764	25849944
79460	27551	25	25854786	25881868
85545	57635	25	25940433	25881869
85775	12766	25	25942555	25957139
86808	1820088	25	25985562	27889147
86328	62773	25	27984268	27919493
210	7683365	25	35728621	27984822
814	2768608	25	35736799	38522789
339	2690500	25	38535247	41343104
550	673903	25	42034920	41350848
724	198848	25	42262434	42047142
129	12639260	26	13122071	383366
669	2794495	26	13124387	16465832
85333	98948	26	16516052	16462460
73668	23834	26	16497839	16513038
86871	5127106	26	21831547	16518207
86460	478277	26	22299226	21834083
86813	928146	26	23264716	22299228
82694	18476	26	23264718	23282805
86500	92023	26	23282806	23373551
86616	41618	26	23453382	23376589
86497	687469	26	24177353	23456258
85295	70696	26	24247555	24177355
86605	1170331	26	25459124	24247556
77352	38302	26	25464571	25484615
439	308441	26	25506118	25683101
252_1	7983518	26	25693093	25788315
83024	20103	26	25808870	26383876
74277	29593	26	25808871	25848212
147	5230949	26	30982544	25852436
83525	40347	26	31023671	30982985
86296	34234	26	31064627	31030551
99	8385443	26	31069950	39548473
86748	2798103	26	39548474	42379001
92597	13933	26	42392817	42379003
459	249962	26	42441870	42719237
86469	828003	26	42719239	43562631
252_2	7983518	26	43563171	51987798
84761	37380	27	492783	457681
328	1702526	27	2165900	492787
236	3787818	27	2192272	6375119
115929	20566	27	6946817	5968434
115930	20560	27	5993006	5966053
86847	223816	27	6231654	6591100
111	8579786	27	6990350	15910713
12	18244797	27	34462974	15918981
477	245564	27	34478557	34745265
148541	17216	27	34749076	34765112
86439	33809	27	34818856	34716928
80	10266263	27	34848704	45564439
510_2	199918	28	109948	300733
455	33641	28	339598	304820
706	19598	28	387635	381125
496_2	47593	28	406567	388671
533	2068907	28	3171087	589962
77473	10441	28	2523562	2532339
559	186825	28	2536445	2897652
85287	43785	28	2835925	2842633
87038	82719	28	2911306	2965489
85278	19893	28	2959710	2960466
553	151535	28	3153815	2700348
86387	13054	28	3173967	3162938
581	2048303	28	3174026	5314511
26	8017169	28	5319209	13463151
85207	11213	28	13479363	13468053
86789	35349	28	13499450	13535262
196	4342684	28	13535276	17948945
73968	25316	28	17953822	17980663
36	7714988	28	25867627	17984691
363	2027048	28	27879202	25872203
86606	182729	28	28070255	27884348
145	3510760	28	28078928	31601149
84953	19981	28	31619599	31601152
82408	17955	28	31646246	31630209
298	3229792	28	31646247	34907973
131	6966560	28	42205225	34912858
83383	56215	28	42264746	42205230
153	3430203	28	45825096	42264747
86992	17599	28	45826379	45834939
63857	64882	29	555965	548084
67904	30861	29	563297	584990
769	7281332	29	8035470	592443
84776	10467	29	8041947	8049773
15	16712041	29	24986988	8049982
729	46470	29	24988349	25034898
670	1588796	29	26736538	25115118
807	905008	29	28028159	26789474
75	8451813	29	28035254	36623968
85345	31572	29	36657438	36626040
86595	113402	29	36774407	36658600
150689	48061	29	36859619	36821049
86461	502758	29	36873119	37370605
86704	2501822	29	37371546	40017568
86200	176138	29	40022765	40196898
760	643374	29	40876767	40197032
255	957245	29	41970441	40892220
502	1063678	29	41913903	42977828
84706	24172	29	43011123	42986862
697	763335	29	43016100	43792106
81489	24675	29	43825297	43800071
100	4643003	29	48519493	43826335
86680	46909	29	48531413	48531410
251	1452253	29	48587805	50200441
356	184540	29	50392601	50206213
357	578792	29	50395820	50942338
642_2	392785	29	51094012	51048207
85576	161010	X	14791	226546
79538	16520	X	295863	293357
85706	212390	X	303505	513036
86037	596270	X	1123094	535509
86510	1749370	X	1138357	2860190
86999	217704	X	2911187	3366397
86963	82196	X	3382477	3382646
482	144524	X	3622913	3477559
86314	793114	X	3626730	4651554
85332	90379	X	4658296	4758524
86299	848938	X	4793859	5769503
86409	1406045	X	7147060	5787489
86632	2568822	X	7155229	9705649
84768	166434	X	9714776	9889030
85508	336252	X	10242196	9889038
86770	811764	X	11071073	10242197
62615	12906	X	11071075	11086690
86118	658254	X	11086691	11725120
81621	10975	X	11732037	11727423
85759	201996	X	11732607	11914948
62428	11051	X	11933324	11923899
80967	12371	X	11933941	11947481
86577	2424189	X	14356684	11945666
86797	76846	X	14356686	14431931
84579	85427	X	14558265	14436167
86644	3484079	X	14602660	59554695
84711	229607	X	14935399	14608716
79335	17792	X	14952440	14968566
86180	715774	X	14968762	15722501
69771	19706	X	15743657	15729249
86538	2379213	X	15770976	18111647
85988	568820	X	18111685	18682568
58521	11456	X	18682569	18693569
678	29247	X	18756490	18783463
71725	10447	X	18806028	18794810
86176	869585	X	19853638	18806977
86659	3547301	X	23606472	19943219
86536	911887	X	24491879	25271778
78078	17436	X	24493431	24492214
85947	456265	X	24967135	24515708
86208	453025	X	25409145	24969559
67914	18850	X	25416041	25409148
67913	11898	X	25460207	25453041
86068	386302	X	25460208	25824995
86638	2526504	X	28213845	25824996
86415	881092	X	28242935	28515969
70032	24071	X	29012090	28993061
86238	677318	X	29027401	29591599
83481	47341	X	29598044	29636208
86837	875766	X	30487443	29648448
85790	214010	X	30495200	30697631
81131	144690	X	30819593	30698476
86322	915573	X	30819597	31722892
79446	17799	X	31723308	31739309
85681	303730	X	31739310	32045964
81412	61689	X	32099668	32160606
61108	11722	X	32161129	32172212
66867	14020	X	32181408	32194013
720	25129	X	32307067	32307119
85959	40831	X	32331781	32407573
86719	118615	X	32407584	32656551
86602	2445226	X	32674822	35102384
86221	575833	X	35111518	35408005
84351	122046	X	35421759	35587418
67918	28864	X	35544429	35566703
81317	16199	X	35577690	35566720
59683	27705	X	35594941	35620930
85647	225490	X	35883037	35620932
86236	571477	X	36476988	35883900
86332	511954	X	37099156	36587863
86241	335422	X	37099161	37428526
81036	18740	X	37453029	37433075
86080	351416	X	37879407	37456196
85124	98178	X	37948571	38015555
84804	31972	X	38112993	38046087
85944	331257	X	44873090	39186805
86315	571155	X	40348363	46101299
86468	1912761	X	40354398	44082990
69731	15116	X	44126283	44082996
86069	453607	X	44140015	44671924
85509	161743	X	44844134	44671926
83229	31576	X	44873052	44844135
84765	153362	X	45057368	44889269
85895	655837	X	45829989	45095313
85792	426257	X	46258560	45829990
85873	369061	X	52696100	46657941
80966	42825	X	43844533	46702291
85970	446158	X	42589897	47158829
68149	16909	X	47178464	47161432
59612	20094	X	47204295	47189031
85676	334276	X	47555313	47204449
86453	1381455	X	49123673	47583378
79457	10977	X	46259572	49123674
63877	36076	X	49198795	49163321
86246	685238	X	50630699	49933843
67910	10311	X	50670104	50660286
86134	846881	X	50670113	51549097
86265	1126809	X	55779675	52355915
67912	29110	X	52355917	52388774
85900	314748	X	52744195	52424643
86530	2290578	X	52693584	55052239
68006	19494	X	51606319	55055500
86463	1726478	X	55799425	57529607
84695	68634	X	57539051	57610699
85170	96654	X	57714619	57633012
86688	25898	X	52744698	57735513
86378	1136421	X	58885947	57740986
85364	232231	X	59133622	58907725
85515	334485	X	59189420	59518623
60750	30999	X	59524663	59554685
82934	23147	X	63502753	63387141
81352	27554	X	63415080	63404637
82472	10438	X	63417515	14482065
85044	115295	X	63309922	63469006
71803	73128	X	63572427	63524311
67923	15265	X	63598394	63585378
86063	609586	X	63598397	64262950
82749	16230	X	64267002	64276497
86162	505445	X	65360569	64613519
78087	10393	X	65361971	65364766
86079	427729	X	65373064	65842072
85286	205253	X	65878256	66068839
59690	10283	X	66080505	66088406
83339	23023	X	66088409	66116418
86371	1093074	X	67292572	66117197
86120	457694	X	67991301	67436286
57621	28184	X	68011479	67991302
84564	172185	X	68018803	68161150
85756	205562	X	68166567	68343682
67928	12831	X	68358660	68347923
62498	22389	X	68385768	68361335
86417	984623	X	68387152	69579017
84767	83201	X	69712996	69589615
85809	189072	X	69731561	70168850
86205	468841	X	70631519	70178037
62565	30518	X	70649481	70669513
86639	2827256	X	70750391	73812057
86410	1212515	X	75116144	73843080
84361	76159	X	75186877	75116601
85597	111120	X	75310467	75191474
62579	10514	X	75351010	75347528
86446	1452572	X	75358460	76718213
86300	825828	X	77509359	76732150
84010	27763	X	77536838	55172189
71801	15891	X	77676312	77573470
86708	71288	X	77831929	77634226
80948	22536	X	77714767	77697821
84865	65265	X	77831926	77765899
86294	1017454	X	78843612	77851169
85691	45746	X	78860624	79001444
85652	286385	X	79322108	79001442
86143	484049	X	79327250	79789488
86533	1862754	X	79789736	81670614
79454	17651	X	81698262	81670617
71746	27388	X	81699899	81724053
85281	262225	X	81944439	81727243
57620	10149	X	81948622	81960059
86369	965548	X	83009221	81961681
76272	21968	X	83035511	83017736
86157	642491	X	83638157	83043709
86035	309856	X	83936645	83639093
81354	12747	X	83937782	83946890
62491	14031	X	83997803	83985108
86224	690117	X	84633983	84004947
385	27201	X	84675652	84705295
171	16340	X	84709470	84810979
170	16360	X	84796368	84814122
702	18178	X	84823356	84839879
86906	16960	X	84850372	84839980
86259	774866	X	84882051	85656593
73839	12789	X	85664372	85676973
85918	383657	X	86290151	85676974
85626	40154	X	86280030	86209298
82868	77943	X	86289947	86255153
62496	11112	X	86288855	86301419
86506	1465215	X	87939177	86305407
86153	572864	X	88525783	87954507
85595	296239	X	88540007	88853486
69845	27890	X	88899954	88865935
86135	607155	X	88912209	89537840
83310	76572	X	89546568	89579219
67915	34685	X	89598162	89674808
85928	122544	X	90309335	89674809
86434	22749	X	90294203	89867430
86984	15522	X	89941118	89913114
84889	21911	X	89887353	89955539
87152	12353	X	90011848	89932435
85342	34936	X	90317623	90014674
86229	56404	X	90395738	90447328
86335	15008	X	90498606	90516360
86293	715567	X	90516362	91181699
74224	16986	X	91245395	91228380
69907	24299	X	91267122	91245705
62673	11055	X	91269225	91280642
71805	47650	X	91322981	91285616
86290	838532	X	92173867	91335463
81024	15237	X	92199327	92206147
86127	535196	X	92229066	92754064
85758	123961	X	92806030	92946364
69232	19366	X	92961610	92972985
86304	890706	X	93888141	92982534
68024	16099	X	93943687	93959639
85231	117727	X	93974811	94072674
79094	14676	X	94081263	94094501
84964	10299	X	94112822	94100878
85123	132641	X	94155554	94269983
62518	18846	X	94300217	94278936
85122	139424	X	94310992	94436739
86394	942629	X	94438814	95380813
85505	54276	X	95380814	95433157
58152	10645	X	95435959	95445473
86487	1422913	X	95476242	96873247
62571	18155	X	96872390	96873248
86308	23771	X	96919437	96880723
85705	280476	X	97415926	96926845
84694	52542	X	97312535	97298318
86139	57266	X	97415899	97314046
86400	1077327	X	98508183	97417049
86764	5188687	X	98525293	103701121
86505	2162893	X	103701123	105844353
86794	114504	X	105844355	106222195
71420	38533	X	106229234	105964232
85761	262992	X	106217815	105964238
85569	113719	X	106247880	106247889
86480	2413398	X	106376706	108829730
78325	19530	X	108829846	108847213
86681	4347274	X	113335119	111138402
79070	25350	X	113380412	113335280
84093	10856	X	113394591	113380414
85492	39445	X	113397431	113438008
86540	2198244	X	115717994	113478461
62567	37916	X	115768533	115718004
86219	874184	X	115792869	116724908
86126	796175	X	116730994	117167792
86634	68294	X	117217239	117273615
86513	2423197	X	117273620	119762019
85935	397720	X	120139003	119756484
68019	28002	X	120139007	120164106
61404	16378	X	120164108	120178248
86097	644910	X	120193261	120843465
86599	2878924	X	118763060	123787340
79089	17229	X	123799064	123789868
87100	45115	X	123894394	123852428
84766	166971	X	124126333	124317721
85367	317113	X	124317722	124639792
84802	113597	X	124666975	124776436
86534	1965220	X	124779767	126765924
86260	969144	X	127735918	126601992
86301	1339402	X	127877910	129204285
82902	10367	X	129205209	126592559
86194	612775	X	130171169	129241411
431	138501	X	130161834	130198342
86562	2372966	X	131994265	130201868
86115	534636	X	132368695	132142896
85810	402747	X	132385142	133111824
87162	59483	X	132875449	132816712
86392	60426	X	133045807	133137885
87073	118846	X	133108503	133207648
512	107784	X	133209445	133305588
240	2378405	X	135695153	133300429
473	1672431	X	135695756	135413825
